# Supplementary material for: Platelet Membrane–Encapsulated MSNs Loaded with SS31 Peptide Alleviate Myocardial Ischemia-Reperfusion Injury
Source: MDPI journal article supplement (doi:10.3390/jfb13040181), 2022-10-09
Supplement: s1 [file s1]

## Additional information for:

# Platelet membrane-encapsulated MSNs loaded with SS31 peptide alleviate myocardial ischemia-reperfusion injury

Zaiyuan Zhang <sup>a,1</sup>, Zhong Chen <sup>b,1</sup>, Ling Yang <sup>c,1</sup>, Jian Zhang <sup>a</sup>, Yubo Li <sup>d</sup>, Chengming Li <sup>c</sup>, Rui Wang <sup>b</sup>, Xue Wang <sup>c</sup>, Shuo Huang <sup>c</sup>, Yonghe Hu <sup>a\*\*</sup>, Jianyou Shi <sup>e\*\*</sup>, Wenjing Xiao <sup>f,g\*</sup>

The file includes: Figure S1

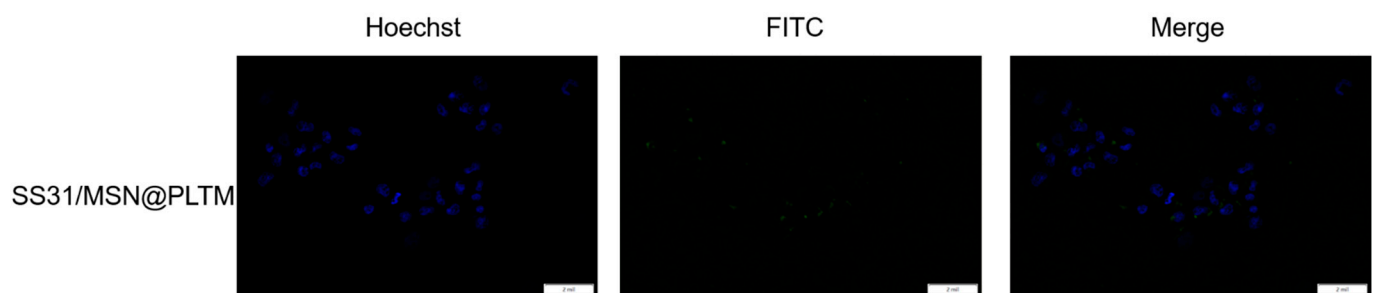

**Figure S1.** Fluorescence images of RAW 264.7 cells with SS31/MSN@PLTM.
